1 **Title**

2 Electrophysiological signatures of acute systemic lipopolysaccharide: potential  
3 implications for delirium science  
4

5 **Author List**

6 \*Ziyad W Sultan, BS<sup>a</sup>  
7 \*Elizabeth R Jaeckel, BS<sup>b</sup>  
8 Bryan M Krause, PhD<sup>a</sup>  
9 Sean M Grady, BS<sup>a</sup>  
10 Caitlin A Murphy, PhD<sup>a</sup>  
11 Robert D Sanders, BSc (Hons) MBBS PhD DABA FRCA<sup>c,d</sup>  
12 Matthew I Banks, PhD<sup>a</sup>  
13

14 \* these authors contributed equally  
15

16 **Affiliations**

17 a – Department of Anesthesiology, School of Medicine and Public Health, University of  
18 Wisconsin–Madison  
19 b – Department of Pharmacology, University of Michigan Medical School  
20 c – Specialty of Anaesthetics, Faculty of Medicine and Health, University of Sydney  
21 d – Department of Anaesthetics, Royal Prince Alfred Hospital, Camerppdown, New South  
22 Wales, Australia  
23

24 **Corresponding Author**

25 Matthew I Banks, PhD  
26 Professor  
27 Department of Anesthesiology  
28 4605 Medical Sciences Center  
29 1300 University Avenue  
30 Madison, WI 53706  
31 608-261-1143  
32 [mibanks@wisc.edu](mailto:mibanks@wisc.edu)  
33  
34

35

36 **Abstract**

37 **Background:** Novel preventive therapies are needed for postoperative delirium, which  
38 especially affects aged patients. A mouse model is presented that captures  
39 inflammation-associated cortical slow wave activity (SWA) observed in patients,  
40 allowing exploration of the mechanistic role of prostaglandin-adenosine signaling.

41 **Methods:** EEG and cortical cytokine measurements (interleukin 6 [IL-6], monocyte  
42 chemoattractant protein-1 [MCP-1]) were obtained from adult and aged mice. Behavior,  
43 SWA, and functional connectivity (alpha-band weighted phase lag index) were assayed  
44 before and after systemic administration of lipopolysaccharide (LPS) +/- piroxicam  
45 (cyclooxygenase inhibitor) or caffeine (adenosine receptor antagonist). To avoid  
46 confounds from inflammation-driven changes in movement, which alter SWA and  
47 connectivity, electrophysiological recordings were classified as occurring during  
48 quiescence or movement, and propensity score matching used to match distributions of  
49 movement magnitude between baseline and LPS.

50 **Results:** LPS produces increases in cortical cytokines and behavioral quiescence. In  
51 movement-matched data, LPS produces increases in SWA (likelihood-ratio test:  
52  $\chi^2(4)=21.51$ ,  $p=0.00057$ ), but not connectivity ( $\chi^2(4)=6.39$ ,  $p=0.17$ ). Increases in SWA  
53 associate with IL6 ( $p<0.001$ ) and MCP-1 ( $p=0.001$ ) and are suppressed by piroxicam  
54 ( $p<0.001$ ) and caffeine ( $p=0.046$ ). Aged animals compared to adult show similar LPS-  
55 induced SWA during movement, but exaggerated cytokine response and increased  
56 SWA during quiescence.

57 **Conclusions:** Cytokine-SWA correlations during wakefulness are consistent with  
58 observations in patients with delirium. Absence of connectivity effects after accounting

59 for movement changes suggests decreased connectivity in patients is a biomarker of  
60 hypoactivity. Exaggerated effects in quiescent aged animals are consistent with  
61 increased hypoactive delirium in older patients. Prostaglandin-adenosine signaling may  
62 link inflammation to neural changes and hence delirium.

63

64 **Keywords**

65 Functional connectivity, delirium, electroencephalography, cytokines, slow wave activity

66

67

68 **Introduction**

69 Inflammation is a key mechanism of many neurological disorders, be they  
70 chronic, such as dementia, or acute, such as delirium<sup>1-6</sup>. Even in less severe cases,  
71 acute inflammation affects brain function through illnesses including the common cold or  
72 influenza, causing neurological effects such as somnolence<sup>7</sup>. Elucidation of how  
73 inflammation affects brain function could highlight therapeutic targets to reduce the  
74 burden of these conditions.

75 Delirium is an acute disturbance of consciousness characterized by reduced  
76 attention, disorganized thinking, and fluctuating arousal levels that often affects sick  
77 elderly patients, especially those undergoing high risk surgery<sup>8-12</sup>. The  
78 electrophysiological hallmark of delirium is EEG slow wave activity (SWA)<sup>13, 14</sup>, similar to  
79 that observed during non-rapid eye movement sleep. SWA during delirium seems to  
80 particularly involve posterior brain regions<sup>14</sup>. Although evidence suggests that SWA  
81 during natural overnight sleep is restorative and enhances cognitive function, SWA  
82 during wakefulness, as occurs in delirium, is associated with cognitive deficits<sup>15</sup>. We  
83 have suggested that SWA may precipitate cognitive disintegration in delirium, such that  
84 patients are awake and confused<sup>1</sup>. Inflammation is the predominant acute cause of  
85 delirium<sup>1, 14, 16</sup>; it drives somnolence and enhances SWA in sleep<sup>17-19</sup>, and inflammation  
86 may similarly drive SWA in delirium<sup>20</sup>. In elderly patients, EEG SWA correlates with  
87 delirium severity, plasma cytokines, and EEG connectivity<sup>14</sup>. Our overarching  
88 hypothesis is that inflammation drives acute changes in SWA and disrupted cortical  
89 connectivity during wakefulness, triggering sudden and profound impairment in

90 cognition. Herein, we test the link between inflammation and changes in brain activity  
91 and connectivity in a mouse model.

92 Progress on developing therapeutic interventions for delirium has been limited  
93 due to the lack of an established animal model to provide insights into its pathogenesis.  
94 The most critical limitation has been in identifying translational biomarkers of this  
95 complex human cognitive disorder. Recognizing the difficulty in establishing an animal  
96 model for these cognitive deficits, we focus on a translational biomarker of delirium,  
97 SWA in the EEG, building on previous work<sup>21, 22</sup>. In a critical advance from this earlier  
98 work, we focus on (i) SWA specific to active wakefulness, (ii) inflammation as the  
99 primary trigger, and (iii) how age may modulate these two factors, consistent with age  
100 being a key predisposing factor to delirium. Furthermore, we test interventions that  
101 attenuate the behavioral consequences of LPS. Based on prior studies showing that  
102 cyclooxygenase inhibitors attenuate acute behavioral changes induced by LPS by  
103 inhibiting the prostaglandin response<sup>3, 23</sup>, and that prostaglandins act as somnogens via  
104 adenosine signaling<sup>24, 25</sup>, we investigated the role of prostaglandin – adenosine  
105 signaling in linking inflammation to changes in neural activity and connectivity.  
106

## 107 **Materials and Methods**

108 Further methodological details can be found in Supplementary Methods online.

### 109 **Data collection**

110 All procedures with animals were approved by the University of Wisconsin-  
111 Madison Institutional Animal Care and Use Committee (IACUC) and in full accordance  
112 with Research Animal Resources and Compliance (RARC). Adult (2-8 months old;  
113 n=68) and aged (16-24 months old, n=14) c57Bl/6J mice were used in this study  
114 (Supplementary Table 1). Of these 82 mice, 72 were instrumented for skull screw EEG  
115 recordings (bilateral parietal and frontal electrodes). After 5-7 days recovery, animal  
116 activity, resting-state EEG, and anterior-posterior functional connectivity were assayed  
117 during the animals' dark (active) phase during a 1hr baseline period and for several  
118 hours after treatments, after which animals were euthanized and their brains frozen for  
119 later cytokine ELISA (Supplementary Figures 1 & 7). For LPS-alone experiments,  
120 animals were recorded 1 hour before and for 4 hours after intraperitoneal (IP) LPS  
121 administration at t=0hr (vehicle=0.9% NaCl, Low LPS=12.5 or 25µg/kg, High  
122 LPS=125µg/kg). For piroxicam experiments, recordings commenced at t=-2hr,  
123 piroxicam (10mg/kg IP) was administered at t=-1hr, followed by LPS (25µg/kg) at t=0hr,  
124 and euthanasia at t=4hr. Because caffeine has a short half-life in mice (<1hr)<sup>26</sup>, three IP  
125 injections of caffeine citrate (30mg/kg) were administered: the first at t=0hr (along with  
126 LPS 25µg/kg), then at t=1hr and t=2hr. To monitor movement and activity levels, video  
127 was recorded for the duration of electrophysiological recording and analyzed offline.

## 128 **Data analysis**

129 Band power analysis of EEG data proceeded according to standard techniques<sup>27</sup>,  
130 with power calculated in 4-second sliding windows in the delta (i.e. SWA, 2-4Hz), theta  
131 (4-12Hz), alpha (13- 20Hz), beta (20-30Hz), and gamma (30-80Hz) bands and  
132 normalized by total power. Functional connectivity was assayed using the alpha band  
133 debiased weighted phase lag index (wPLI)<sup>28</sup>, calculated in 20-second sliding windows  
134 between anterior and posterior channel pairs for each hemisphere, and averaged  
135 across hemispheres. We chose alpha band wPLI *a priori* because it is a standard metric  
136 of functional connectivity<sup>27</sup> and is used especially in other papers on delirium<sup>14, 29, 30</sup>. A  
137 movement signal, derived from the smoothed and normalized frame-by-frame video  
138 difference signal, was aligned in time with the simultaneously recorded EEG signal, and  
139 the movement signal averaged in each 4-sec or 20-sec epoch for band power and wPLI  
140 analysis, respectively. Epochs with nonzero estimated movement were used to  
141 calculate electrophysiological parameters corresponding to active wakefulness. To  
142 ensure that drug-induced changes in activity level for epochs classified as active  
143 wakefulness did not influence measured electrophysiological parameters, distributions  
144 of movement signal magnitude were matched between baseline and treatment periods  
145 using propensity score matching (PSM; Supplementary Figure 2)<sup>31</sup>.

146 Cytokine quantification was applied to brains from 46 mice with EEG recordings  
147 and 10 uninstrumented mice subjected to identical drug treatments (Supplementary  
148 Table 1). The cytokines interleukin 6 (IL-6) and monocyte chemoattractant protein-1  
149 (MCP-1) were quantified by multiplex ELISA performed by Eve Technologies (#MDF10,  
150 Calgary, AB, Canada). IL-6 was selected *a priori* as the primary cytokine of interest, as

151 brain levels of IL-6 increase dramatically in the hours following peripheral treatment with  
152 LPS<sup>32</sup>, with IL-6 having a relatively long half-life compared to other cytokines<sup>33</sup>, and IL-6  
153 tends to be higher in hip-fracture surgical patients with delirium compared to those  
154 without<sup>34</sup>. Additionally, MCP-1 was chosen based on our recent findings in humans  
155 showing that MCP-1 correlates with delirium severity and EEG slow wave activity<sup>14</sup>.

156 To compare LPS-driven changes in EEG and activity measures across time, data  
157 were averaged across epochs during a “peak effect” period (t=1 to 3hrs post-injection)  
158 and compared to the average across epochs during the “baseline” pre-injection period  
159 (t=-1 to 0hr). LPS effects on band power, movement, and wPLI were assessed by fitting  
160 linear mixed effects models<sup>35</sup>. Fixed effects were treatment group, experiment epoch  
161 (baseline vs. peak effect), and their interaction, with random effects for animal to  
162 account for repeated measures and for multiple electrodes within animals when  
163 appropriate. Models fit to cytokine data used group and region (anterior/posterior) as  
164 fixed effects.

165 LPS dose categories were as follows: “Vehicle” (n=7) corresponded to 0µg/kg  
166 (i.e. 0.9% NaCl alone), “Low LPS” to 12.5µg/kg (n=8) and 25µg/kg (n=15) (grouped  
167 together as the outcomes of statistical analyses were unchanged by grouping the low  
168 doses), and “High LPS” (n=8) to 125µg/kg. Effects of LPS were tested by comparing  
169 models with and without the group-by-epoch interaction (or group-by-region for cytokine  
170 data) using likelihood ratio tests. Caffeine and the associated saline controls were fit in  
171 separate models from the other groups due to their differing experiment schedule, which  
172 may have affected behavior and precluded direct comparisons of these groups to the  
173 others. Post-hoc comparisons used the Kenward-Roger method and p-values were



174 adjusted for the family of relevant multiple comparisons by estimating a multivariate t-  
175 distribution using the emmeans package for R<sup>36</sup>.

176 For relationships between cytokine levels and changes in movement-matched  
177 SWA, we fit a linear model to all data in the Vehicle, Low LPS, and High LPS groups to  
178 estimate SWA as a function of cytokine concentration. We then predicted SWA changes  
179 based on cytokine levels observed in the PXM + Low LPS group and tested whether the  
180 mean residual differed from zero using a one-sample t-test.

181

## 182 **Results**

### 183 **LPS injection increases inflammatory markers in the brain**

184 We first used ELISA to measure protein levels of proinflammatory cytokines IL-6  
185 and MCP-1 (Figure 1A-B) in anterior or posterior mouse neocortex (*purple* and *green*,  
186 respectively) four hours after IP injection of LPS. There was no interaction between  
187 region and LPS dose for IL-6 (likelihood ratio test adding location:  $\chi^2(4)=4.30$ ,  $p=0.37$ )  
188 or MCP-1 (likelihood ratio test adding location:  $\chi^2(4)=6.85$ ,  $p=0.14$ ); thus, we averaged  
189 anterior and posterior samples. IL-6 and MCP-1 levels were elevated following LPS  
190 injection, and there was a significant overall effect of LPS group on cytokine  
191 concentration (Table 1A-B). Cytokine levels in Vehicle animals were not different from  
192 Low LPS animals, though both groups had significantly lower cytokine levels compared  
193 to High LPS.

194

### 195 **LPS injection increases SWA and decreases antero-posterior connectivity**

196 LPS administration was followed by a slowing of resting-state brain activity,  
197 manifest as an increase in SWA in the EEG signal (Figure 2A-B) and a concomitant  
198 decrease in amplitude in higher frequency bands, such as gamma (Supplementary  
199 Figure 3). SWA band power showed clear changes following LPS injection, with the  
200 effect reaching a peak between 1- and 3-hours post-injection (“peak LPS”; Figure 2B).  
201 Increases in SWA from baseline to peak LPS significantly depended on LPS dose  
202 (Table 1C). Similarly, decreases in gamma power following LPS treatment were dose-  
203 dependent (Supplementary Figure 4A; Table 1D). In a regional analysis of SWA we  
204 found a significant interaction between anterior/posterior region, group, and time

205 (likelihood ratio test:  $\chi^2(3)=8.82$ ,  $p=0.032$ ). However, this effect was limited to a larger  
206 posterior compared to anterior increase in the High LPS animals, which could be  
207 explained by ceiling effects specifically in the High LPS condition (at baseline, anterior  
208 SWA was greater than posterior power in all groups). Since animals in all subsequent  
209 experiments received either Vehicle or Low LPS, and because the LPS effect was  
210 comparable anterior and posterior in the Low LPS group, we did not alter our *a priori*  
211 statistical plan to combine anterior and posterior channels in analyses of power.

212 Previous reports have suggested that cortical functional connectivity (measured  
213 by alpha-band wPLI) is disrupted in delirious patients<sup>14, 29</sup>, and systemic LPS can alter  
214 connectivity in human volunteers<sup>37</sup>. Consistent with these previous observations, we  
215 observed decreased alpha-band wPLI following injection of LPS (Figure 2C). Alpha-  
216 band connectivity decreased more in Low LPS and High LPS animals compared to  
217 Vehicle, though there was no difference between LPS doses (Table 1E).

218

### 219 **LPS decreases movement**

220 Animals injected with LPS exhibited sickness behavior typical of systemic  
221 inflammation, including piloerection, hunched posture, and reduced locomotion and  
222 grooming activity<sup>38</sup>. The effect of LPS on overall activity level was quantified by the  
223 magnitude of the movement signal derived from the video recordings (Supplementary  
224 Figure 5, *black*; see Methods). Consistent with prior observations<sup>39</sup>, LPS caused a  
225 dramatic decrease in movement from baseline to peak LPS hours (Figure 2D).  
226 Movement decreased more in Low LPS and High LPS animals compared to Vehicle,  
227 though there was no significant difference between LPS doses (Table 1F).

228

229 **SWA in LPS increases after correcting for changes in movement**

230 Because EEG delta power is higher and gamma power is lower during sleep and  
231 quiescent wakefulness compared to active wakefulness<sup>40, 41</sup>, the changes in movement  
232 following LPS injection could themselves account for the observed slowing in EEG  
233 signals. In all animals, movement was negatively correlated with SWA (Supplementary  
234 Figure 5; Supplementary Figure 6A;  $r^2=0.313$ ,  $p<0.05$ ). Because delirium in patients is  
235 characterized by elevated delta power during wakefulness<sup>13, 14</sup>, we tested whether LPS  
236 caused a slowing of the EEG after accounting for the LPS-induced decrease in  
237 movement.

238 In an exploratory analysis, we calculated power spectral density in overlapping 4-  
239 second windows and averaged the power spectra over epochs within lower or upper  
240 quartile movement ranges, as well as quiescence (Figure 2E *top*). As expected, under  
241 baseline conditions, the power spectra changed based on the magnitude of movement,  
242 with SWA suppressed during movement compared to quiescence, and in the highest  
243 quartile of activity compared to the lowest. Importantly, the same analysis applied to  
244 data recorded after administration of LPS did not show changes in the power spectra  
245 with increases in movement (Figure 2E *bottom*). Instead, following LPS administration,  
246 SWA was elevated even during movement, rendering power spectra during movement  
247 similar to those recorded during quiescence.

248 The analysis of Figure 2E suggests an effect of LPS on SWA during active  
249 wakefulness. However, to quantify this effect, we would want to compare SWA recorded  
250 during periods with identical movement profiles. To achieve this, we applied propensity

251 score matching (Supplementary Figure 2) to compare SWA across comparable  
252 distributions of movement recorded during baseline and Peak LPS. LPS caused a steep  
253 increase in movement-matched SWA (Figure 3A), though there was no significant  
254 difference between LPS doses (Table 1G). SWA during quiescent periods was  
255 increased by LPS treatment (Figure 3B), though this effect was mainly driven by aged  
256 animals (discussed later) and no direct comparisons showed differences between the  
257 adult LPS-only groups (Table 1H).

258

### 259 **Cortical connectivity is unchanged in LPS after correcting for changes in activity**

260 Under baseline conditions, we observed that alpha-band wPLI was positively  
261 correlated with movement (Supplementary Figure 6B;  $r^2=0.435$ ,  $p<0.05$ ), suggesting that  
262 the decrease in wPLI observed in LPS could be due to the reduction in movement  
263 following injection of LPS. This is indeed what was observed when we applied  
264 propensity score matching to the relationship between wPLI and movement. To obtain  
265 accurate measures of wPLI, we expanded the time window for movement analysis to 20  
266 seconds, slightly reducing the temporal resolution of changes in activity level. The  
267 movement-matched alpha-band wPLI was unaffected by LPS (Figure 3C; Table 1I),  
268 indicating the absence of changes in wPLI after accounting for LPS-induced decreases  
269 in movement. wPLI during quiescence was also unaffected by LPS treatment (Figure  
270 3D; Table 1J).

271

272 **Neocortical cytokine levels correlate with changes in movement-matched SWA**

273 We observed increases in cytokine levels following injection of LPS and  
274 systematic increases in SWA after accounting for the effect of LPS on movement. We  
275 next sought to determine if the magnitude of the increase in cytokine levels and the  
276 magnitude of the changes in brain activity were related for the measures that showed  
277 significant LPS effects. IL-6 levels correlated with increases in movement-matched  
278 SWA for LPS-only groups (Figure 4A;  $r^2=0.662$ ,  $p<0.00001$ ), as did MCP-1 levels  
279 (Figure 4B;  $r^2=0.541$ ,  $p=0.0014$ ).

280

281 **Piroxicam attenuates the EEG slowing in LPS without affecting brain IL-6 levels**  
282 **or acute decreases in movement**

283 Piroxicam is a non-selective cyclooxygenase inhibitor previously shown to  
284 attenuate acute behavioral changes induced by LPS<sup>3, 23</sup>. We first determined that  
285 10mg/kg piroxicam administration prior to Low LPS did not affect neocortical levels of  
286 IL-6 or MCP-1 compared to Low LPS alone (Supplemental Figure 7A-B; Table 1A),  
287 indicating any effect of piroxicam electrophysiologically or behaviorally would be  
288 downstream of the initial pro-inflammatory cytokine response, similar to prior reports.

289 Piroxicam blunted the LPS-induced increase of overall SWA (i.e. before  
290 accounting for movement; Figure 5A *red*; Table 1C) and gamma power (Supplementary  
291 Figure 4B; Table 1D) but did not decrease the impact of LPS on wPLI (Figure 5B; Table  
292 1E). Piroxicam did not alter movement during the peak hours following LPS injection  
293 compared to Low LPS-only animals (Figure 5C). However, the difference in movement  
294 between baseline and the final recording hour (the fourth hour post-LPS, not included in

295 'Peak LPS') was significantly smaller in 'PXM+Low LPS' relative to Low LPS alone  
296 (likelihood ratio test:  $\chi^2(1)=16.625$ ,  $p<0.0001$ ), suggesting that piroxicam-treated  
297 animals may recover more quickly. Piroxicam attenuated the LPS-induced increase in  
298 movement-matched SWA (Figure 3A; Table 1G). As with Low LPS alone, piroxicam did  
299 not change SWA during quiescent periods (Figure 3B; Table 1H). Further, piroxicam  
300 animals showed smaller movement-matched SWA changes than would have been  
301 predicted from IL-6 (Figure 4A *red*; For PXM prediction residuals, one-sample t-test vs  
302 zero:  $t=-3.78$ ,  $df=6$ ,  $p=0.0092$ ) or MCP-1 levels (Figure 4B *red*; for PXM prediction  
303 residuals, one-sample t-test vs zero:  $t=-3.54$ ,  $df=6$ ,  $p=0.012$ ).

304         Given prior data showing that piroxicam blunts the prostaglandin response to  
305 LPS by inhibiting COX activity<sup>3, 23</sup>, and that prostaglandin D<sub>2</sub> acts as a powerful  
306 somnogen via downstream effects on adenosine signaling<sup>24, 25</sup>, we further investigated  
307 the role of this pathway in LPS-induced SWA by testing the effect of caffeine citrate.

308

### 309 **Repeated injection of caffeine diminishes LPS-induced EEG changes**

310         Caffeine promotes wakefulness through antagonism at the A<sub>2A</sub> adenosine  
311 receptor<sup>42, 43</sup>, which is a downstream mediator of the somnogenic prostaglandin D<sub>2</sub> that  
312 is known to affect cortical arousal<sup>25, 44, 45</sup>. When animals were administered LPS in  
313 combination with caffeine citrate, they showed lower overall SWA (Figure 5A *blue*),  
314 higher gamma power (Supplementary Figure 4B), increased alpha-band wPLI, and  
315 increased movement compared to animals administered LPS with saline (Figure 5B-C;  
316 Table 1C-F). Caffeine blunted the effects of LPS on the movement-matched SWA  
317 compared to animals treated with LPS plus saline (Figure 3A; Table 1G). Caffeine did

318 not alter SWA during quiescence compared to saline-treated animals (Figure 3B; Table  
319 1H). The effect of caffeine citrate treatment plus LPS on movement-matched wPLI  
320 relative to animals treated with saline plus LPS (Figure 3C) was strikingly similar to the  
321 effect of Vehicle versus Low LPS reported above (compare Figure 3C), though here the  
322 difference between the two was statistically significant (Table 1I). Caffeine pretreatment  
323 did not alter wPLI during quiescence relative to saline (Figure 3D; Table 1J).

324

### 325 **Aged animals exhibit exaggerated EEG slowing during quiescence**

326 As delirium is most relevant in aged populations<sup>46</sup>, we repeated LPS experiments  
327 in aged mice and compared results to adult animals. As expected<sup>47</sup>, aged mice  
328 compared to adults showed higher neocortical IL-6 as well as higher MCP-1 protein  
329 levels in response to LPS treatment (Supplementary Figure 6A-B; Table 1A-B). Aged  
330 animals demonstrated an increased overall SWA response to LPS compared to adult  
331 animals (Figure 5A *green*; Table 1C), though this was not observed for gamma power  
332 (Supplementary Figure 4B; Table 1D). Decreases in wPLI were exaggerated in aged  
333 animals (Figure 5B; Table 1E). LPS-driven decreases in movement were not different  
334 between aged animals and adults (Figure 5C; Table 1F). Increases in movement-  
335 matched SWA due to LPS were not different from adult animals (Figure 3A; Table 1G).  
336 Instead, SWA during quiescence was greatly increased in aged compared to adult  
337 animals (Figure 3B; Table 1H), and this was the only significant contrast in the model. As  
338 stated above, changes in both movement-matched and quiescent alpha wPLI following  
339 LPS treatment were not significant in models including aged animals (Figure 3C-D;  
340 Table 1I-J).



## 341 **Discussion**

### 342 **Inflammation-induced changes in cortical activity**

343 Inflammation causes acute changes in brain activity and connectivity in  
344 hippocampus, where changes in synaptic plasticity may underlie cognitive deficits  
345 observed during delirium<sup>48, 49</sup>. Less is known about the effects of inflammation on  
346 neocortical activity. Our results show some alignment with previous findings in rodents<sup>22,</sup>  
347 <sup>50</sup>, where a much higher dose of LPS (1mg/kg) slowed hippocampal theta rhythms  
348 independently of changes in locomotion, though comparable effects were not observed  
349 in prefrontal cortex, suggesting the slowing is region-selective. The data presented here  
350 suggest a similar regional heterogeneity, as posterior increases in SWA were larger  
351 than anterior in High LPS animals, but this observation requires confirmation with further  
352 experiments. Posterior cortical SWA appears particularly important in delirium<sup>14</sup>.  
353 Previous studies have also described EEG slowing and decreases in alpha antero-  
354 posterior wPLI<sup>50</sup>, but did not account for effects on movement<sup>40</sup> and also used a much  
355 higher dose of LPS (1mg/kg), making their results more likely to reflect somnolence  
356 rather than wakeful EEG activity<sup>39</sup>.

357 Our findings with aged animals indicate an exaggerated biochemical and  
358 electrophysiological response to inflammation, but since the differences between aged  
359 and adult animals were only observed in quiescence, those electrophysiological effects  
360 could be secondary to increased hypoactivity. Further work is needed to determine  
361 whether this rise in SWA in mice during quiescence reflects hypoactive wakefulness or  
362 sleep, but the data suggest that inflammation in aged animals induces a hypoactive  
363 phenotype that is particularly prevalent in elderly patients<sup>46</sup>.

364

### 365 **Inflammation-induced changes in cortical connectivity**

366       The finding that alpha-band wPLI connectivity changes were attributable to  
367 changes in movement is potentially of clinical significance. The association of impaired  
368 alpha-band wPLI with delirium stems from work in postoperative patients where delirium  
369 is predominantly hypoactive<sup>14, 29, 30</sup>. In contrast, a study of delirium on emergence from  
370 anesthesia in young children, which is typically hyperactive, found increased alpha band  
371 connectivity during delirium<sup>51</sup>. In this context, reduced alpha-band wPLI may represent a  
372 specific marker of hypoactive delirium and this possibility should be tested in a cohort of  
373 patients including hypoactive and hyperactive delirium.

374

### 375 **Cytokine cascades contributing to inflammation**

376       We acknowledge important differences in approaches to the study of  
377 inflammation in the mouse and human models. Notably we induced systemic  
378 inflammation in the mouse model using LPS, but focused on brain inflammation as a  
379 surrogate of neuroinflammatory hypotheses of delirium. In our recent work on delirium<sup>14</sup>  
380 we studied plasma cytokines, a more distant surrogate of neuroinflammation. In the  
381 current study, we specified *a priori* that IL-6 would be the primary cytokine of interest  
382 due to its sensitivity to LPS<sup>32</sup>, long half-life<sup>33</sup>, and prior data from cerebrospinal fluid  
383 studies of delirium<sup>52</sup>. We complemented this with study of MCP-1 based on our recent  
384 paper<sup>14</sup>. Given redundancy in cytokine cascades, the next step is to understand local  
385 neuronal, immune, and circuit dynamics of these inflammatory stimuli. We suggest that  
386 inflammation drives EEG changes through induced release of prostaglandin D<sub>2</sub> and

387 subsequent effects on adenosine signaling, most likely in sleep and arousal centers in  
388 the hypothalamus and basal forebrain (Figure 6)<sup>25</sup>. Verification of the locus of  
389 adenosine's actions, and investigation of possible direct actions of adenosine on cortical  
390 circuits, awaits further experiments. As non-steroidal anti-inflammatory drugs should be  
391 avoided in vulnerable elderly patients, future studies should focus on the therapeutic  
392 benefit of targeted manipulation of adenosine signaling in this mouse model and in a  
393 clinical setting.

394

### 395 **Translational relevance**

396 Our focus has been on objective translational features of delirium that can be  
397 feasibly studied in the rodent. In contrast to studies of sepsis, where LPS is viewed as a  
398 suboptimal model<sup>53</sup>, LPS is commonly used in rodent studies of the mechanisms of  
399 delirium because it produces a profound and consistent proinflammatory response<sup>3, 22,</sup>  
400 <sup>49</sup>. Our approach was to model how this inflammatory response affects EEG activity  
401 during movement to avoid the confound of sleep. As elevated SWA during wakefulness  
402 is a key criterion for delirium and is often associated with inattention, another key  
403 criterion, our model has a plausible association with delirium. The cognitive features that  
404 define delirium include impaired attention, arousal, executive function, orientation to the  
405 environment and memory as well as perceptual disturbances. Because inflammatory  
406 agents such as LPS affect motivation and motor function in animal models, investigating  
407 the cognitive correlates of inflammation behaviorally in mice is complicated<sup>39</sup>. Instead,  
408 we present an animal model of inflammation-related SWA during wakefulness;  
409 establishing this animal model opens opportunities for testing hypotheses about

410 mechanisms and treatments for delirium and other inflammatory brain disorders. We  
411 consider this work to be complementary to work done with cognitive testing<sup>3, 54</sup>, which  
412 itself has limitations regarding the characterization of a complex human disorder in  
413 mice. Importantly, we recently showed that inflammation-driven SWA correlates with  
414 delirium severity in humans<sup>14</sup>, hence the ability to model this effect in mice and study  
415 mechanisms represents a major methodological advance. Furthermore, delirium,  
416 cognitive decline, and dementia are profound cognitive disorders associated with  
417 inflammation<sup>2, 4, 5</sup> as well as changes in SWA<sup>13, 55, 56</sup>. Hence understanding the  
418 mechanisms whereby inflammation drives SWA may illuminate the key  
419 pathophysiological mechanisms of cognitive impairment in a variety of disorders.

420

#### 421 **Future directions**

422 The data presented here motivate future investigations into the mechanisms  
423 linking inflammation to changes in neural activity and connectivity. For example,  
424 previous studies have shown the acute behavioral effects of LPS are driven by  
425 peripheral IL-1B<sup>49</sup>; thus, it would be illuminating to measure plasma inflammatory  
426 markers in addition to measuring cortical cytokines. Future experiments should also  
427 identify specific receptor subtypes and other aspects of the signaling pathways involved  
428 in the link between neuroinflammation and changes in brain activity. For example, we  
429 tested caffeine, which is a non-specific adenosine receptor antagonist and has potential  
430 clinical application. Elucidating the roles of adenosine A<sub>1</sub> versus A<sub>2</sub> receptors would  
431 allow for more targeted drug development. In addition, future studies should include the  
432 effects of inflammation in mice modeling disorders associated with delirium, like

433 dementia. More broadly, the model presented here opens opportunities for testing the  
434 roles of specific neuronal, glial, and immune cell types in the signaling cascade linking  
435 inflammation to drastic changes in brain function<sup>55, 56</sup>.

436 **Authors' contributions**

437 ZWS: Study design, data collection, data analysis, manuscript revision

438 ERJ: Study design, data collection, data analysis, writing first draft of paper

439 BMK: Study design, data analysis, manuscript revision

440 SMG: Data collection, data analysis, manuscript revision

441 CAM: Study design, manuscript revision

442 RDS: Study design, writing first draft of paper, manuscript revision

443 MIB: Study design, writing first draft of paper, manuscript revision

444

445 **Acknowledgements**

446 The authors thank Elizabeth A. Townsend, Payge A. Barnard, Jens Mellby, Hazel

447 Bastien, and Matthieu Darracq for technical assistance.

448

449 **Declaration of Interest**

450 The authors declare no competing financial interests.

451

452 **Funding**

453 Supported by National Institutes of Health (R01 GM109086 to M. I. Banks; R01

454 AG063849 to R. D. Sanders), and the Department of Anesthesiology, School of

455 Medicine and Public Health, University of Wisconsin, Madison, WI.

456

## 457 **References**

- 458 1. Sanders RD. Hypothesis for the pathophysiology of delirium: role of baseline  
459 brain network connectivity and changes in inhibitory tone. *Med Hypotheses* 2011; **77**:  
460 140–3
- 461 2. Cunningham C, Maclullich AMJ. At the extreme end of the  
462 psychoneuroimmunological spectrum: delirium as a maladaptive sickness behaviour  
463 response. *Brain Behav Immun* 2013; **28**: 1–13
- 464 3. Griffin ÉW, Skelly DT, Murray CL, Cunningham C. Cyclooxygenase-1-Dependent  
465 Prostaglandins Mediate Susceptibility to Systemic Inflammation-Induced Acute  
466 Cognitive Dysfunction. *J Neurosci* 2013; **33**: 15248–58
- 467 4. Ramanan VK, Risacher SL, Nho K, et al. GWAS of longitudinal amyloid  
468 accumulation on 18F-florbetapir PET in Alzheimer’s disease implicates microglial  
469 activation gene IL1RAP. *Brain* 2015; **138**: 3076–88
- 470 5. Whittington RA, Planel E, Terrando N. Impaired Resolution of Inflammation in  
471 Alzheimer’s Disease: A Review. *Front Immunol* 2017; **8**: 1464
- 472 6. Merluzzi AP, Carlsson CM, Johnson SC, et al. Neurodegeneration, synaptic  
473 dysfunction, and gliosis are phenotypic of Alzheimer dementia. *Neurology* 2018; **91**:  
474 e436–43
- 475 7. Writing Committee of the WHO Consultation on Clinical Aspects of Pandemic  
476 (H1N1) 2009 Influenza, Bautista E, Chotpitayasunondh T, et al. Clinical aspects of  
477 pandemic 2009 influenza A (H1N1) virus infection. *N Engl J Med* 2010; **362**: 1708–19
- 478 8. Ely EW, Gautam S, Margolin R, et al. The impact of delirium in the intensive care  
479 unit on hospital length of stay. *Intensive Care Med* 2001; **27**: 1892–900
- 480 9. Pandharipande PP, Pun BT, Herr DL, et al. Effect of sedation with  
481 dexmedetomidine vs lorazepam on acute brain dysfunction in mechanically ventilated  
482 patients: the MENDS randomized controlled trial. *JAMA* 2007; **298**: 2644–53
- 483 10. Riker RR, Shehabi Y, Bokesch PM, et al. Dexmedetomidine vs midazolam for  
484 sedation of critically ill patients: a randomized trial. *JAMA* 2009; **301**: 489–99
- 485 11. Pandharipande PP, Girard TD, Jackson JC, et al. Long-term cognitive  
486 impairment after critical illness. *N Engl J Med* 2013; **369**: 1306–16
- 487 12. Rudolph JL, Jones RN, Levkoff SE, et al. Derivation and validation of a  
488 preoperative prediction rule for delirium after cardiac surgery. *Circulation* 2009; **119**:  
489 229–36
- 490 13. Ponten SC, Tewarie P, Slooter AJC, Stam CJ, van Dellen E. Neural network  
491 modeling of EEG patterns in encephalopathy. *J Clin Neurophysiol* 2013; **30**: 545–52
- 492 14. Tanabe S, Mohanty R, Lindroth H, et al. Cohort study into the neural correlates of  
493 postoperative delirium: the role of connectivity and slow-wave activity. *Br J Anaesth*  
494 2020; **125**: 55–66
- 495 15. Nir Y, Andrillon T, Marmelshtein A, et al. Selective neuronal lapses precede  
496 human cognitive lapses following sleep deprivation. *Nat Med* 2017; **23**: 1474–80
- 497 16. Casey CP, Lindroth H, Mohanty R, et al. Postoperative delirium is associated  
498 with increased plasma neurofilament light. *Brain* 2020; **143**: 47–54
- 499 17. Yasuda T, Yoshida H, Garcia-Garcia F, Kay D, Krueger JM. Interleukin-1beta  
500 has a role in cerebral cortical state-dependent electroencephalographic slow-wave  
501 activity. *Sleep* 2005; **28**: 177–84

- 502 18. Taishi P, Churchill L, Wang M, et al. TNF $\alpha$  siRNA reduces brain TNF and  
503 EEG delta wave activity in rats. *Brain Res* 2007; **1156**: 125–32
- 504 19. Krueger JM, Clinton JM, Winters BD, et al. Involvement of cytokines in slow wave  
505 sleep. *Prog Brain Res* 2011; **193**: 39–47
- 506 20. Plaschke K, Fichtenkamm P, Schramm C, et al. Early postoperative delirium after  
507 open-heart cardiac surgery is associated with decreased bispectral EEG and increased  
508 cortisol and interleukin-6. *Intensive Care Med* 2010; **36**: 2081–9
- 509 21. Trzepacz PT, Leavitt M, Ciongoli K. An animal model for delirium.  
510 *Psychosomatics* 1992; **33**: 404–15
- 511 22. Mamad O, Islam MN, Cunningham C, Tsanov M. Differential response of  
512 hippocampal and prefrontal oscillations to systemic LPS application. *Brain Res* 2018;  
513 **1681**: 64–74
- 514 23. Teeling JL, Cunningham C, Newman TA, Perry VH. The effect of non-steroidal  
515 anti-inflammatory agents on behavioural changes and cytokine production following  
516 systemic inflammation: Implications for a role of COX-1. *Brain Behav Immun* 2010; **24**:  
517 409–19
- 518 24. Qu W-M, Huang Z-L, Xu X-H, et al. Lipocalin-type prostaglandin D synthase  
519 produces prostaglandin D2 involved in regulation of physiological sleep. *Proc Natl Acad*  
520 *Sci U S A* 2006; **103**: 17949–54
- 521 25. Saper CB, Romanovsky AA, Scammell TE. Neural circuitry engaged by  
522 prostaglandins during the sickness syndrome. *Nat Neurosci* 2012; **15**: 1088–95
- 523 26. Hartmann M, Czok G. [Pharmacokinetics of caffeine in mice and its modification  
524 by ethanol]. *Z Ernährungswiss* 1980; **19**: 215–27
- 525 27. Banks MI, Krause BM, Endemann CM, et al. Cortical functional connectivity  
526 indexes arousal state during sleep and anesthesia. *NeuroImage* 2020; **211**: 116627
- 527 28. Vinck M, Oostenveld R, van Wingerden M, Battaglia F, Pennartz CMA. An  
528 improved index of phase-synchronization for electrophysiological data in the presence  
529 of volume-conduction, noise and sample-size bias. *NeuroImage* 2011; **55**: 1548–65
- 530 29. van Dellen E, van der Kooij AW, Numan T, et al. Decreased functional  
531 connectivity and disturbed directionality of information flow in the  
532 electroencephalography of intensive care unit patients with delirium after cardiac  
533 surgery. *Anesthesiology* 2014; **121**: 328–35
- 534 30. Numan T, Slooter AJC, van der Kooij AW, et al. Functional connectivity and  
535 network analysis during hypoactive delirium and recovery from anesthesia. *Clin*  
536 *Neurophysiol* 2017; **128**: 914–24
- 537 31. Ho DE, Imai K, King G, Stuart EA. Matching as Nonparametric Preprocessing for  
538 Reducing Model Dependence in Parametric Causal Inference. *Polit Anal* 2007; **15**: 199–  
539 236
- 540 32. Skelly DT, Hennessy E, Dansereau M-A, Cunningham C. A systematic analysis  
541 of the peripheral and CNS effects of systemic LPS, IL-1 $\beta$ , [corrected] TNF- $\alpha$  and IL-6  
542 challenges in C57BL/6 mice. *PLoS One* 2013; **8**: e69123
- 543 33. Oda S, Hirasawa H, Shiga H, Nakanishi K, Matsuda K, Nakamura M. Sequential  
544 measurement of IL-6 blood levels in patients with systemic inflammatory response  
545 syndrome (SIRS)/sepsis. *Cytokine* 2005; **29**: 169–75



- 546 34. Munster BCV, Korevaar JC, Zwinderman AH, Levi M, Wiersinga WJ, Rooij SED.  
547 Time-Course of Cytokines During Delirium in Elderly Patients with Hip Fractures. *J Am*  
548 *Geriatr Soc* 2008; **56**: 1704–9
- 549 35. Bates D, Mächler M, Bolker B, Walker S. Fitting Linear Mixed-Effects Models  
550 Using lme4. *J Stat Softw* 2015; **67**: 1–48
- 551 36. Lenth R, Buerkner P, Herve M, Love J, Riebl H, Singmann H. emmeans:  
552 Estimated Marginal Means, aka Least-Squares Means [Internet]. 2020 [cited 2020 Aug  
553 19]. Available from: <https://CRAN.R-project.org/package=emmeans>
- 554 37. Labrenz F, Wrede K, Forsting M, et al. Alterations in functional connectivity of  
555 resting state networks during experimental endotoxemia - An exploratory study in  
556 healthy men. *Brain Behav Immun* 2016; **54**: 17–26
- 557 38. Dantzer R, O'Connor JC, Freund GG, Johnson RW, Kelley KW. From  
558 inflammation to sickness and depression: when the immune system subjugates the  
559 brain. *Nat Rev Neurosci* 2008; **9**: 46–56
- 560 39. Cunningham C, Sanderson DJ. Malaise in the water maze: untangling the effects  
561 of LPS and IL-1 $\beta$  on learning and memory. *Brain Behav Immun* 2008; **22**: 1117–27
- 562 40. Hansen IH, Agerskov C, Arvastson L, Bastlund JF, Sørensen HBD, Herrik KF.  
563 Pharmaco-electroencephalographic responses in the rat differ between active and  
564 inactive locomotor states. *Eur J Neurosci* 2019; **50**: 1948–71
- 565 41. Maloney KJ, Cape EG, Gotman J, Jones BE. High-frequency gamma  
566 electroencephalogram activity in association with sleep-wake states and spontaneous  
567 behaviors in the rat. *Neuroscience* 1997; **76**: 541–55
- 568 42. Huang Z-L, Qu W-M, Eguchi N, et al. Adenosine A<sub>2A</sub>, but not A<sub>1</sub>, receptors  
569 mediate the arousal effect of caffeine. *Nat Neurosci* Nature Publishing Group; 2005; **8**:  
570 858–9
- 571 43. Yacoubi ME, Ledent C, Ménard J-F, Parmentier M, Costentin J, Vaugeois J-M.  
572 The stimulant effects of caffeine on locomotor behaviour in mice are mediated through  
573 its blockade of adenosine A<sub>2A</sub> receptors. *Br J Pharmacol* 2000; **129**: 1465–73
- 574 44. Terao A, Matsumura H, Saito M. Interleukin-1 Induces Slow-Wave Sleep at the  
575 Prostaglandin D<sub>2</sub>-Sensitive Sleep-Promoting Zone in the Rat Brain. *J Neurosci Society*  
576 *for Neuroscience*; 1998; **18**: 6599–607
- 577 45. Scammell T, Gerashchenko D, Urade Y, Onoe H, Saper C, Hayaishi O.  
578 Activation of ventrolateral preoptic neurons by the somnogen prostaglandin D<sub>2</sub>. *Proc*  
579 *Natl Acad Sci National Academy of Sciences*; 1998; **95**: 7754–9
- 580 46. Fong TG, Tulebaev SR, Inouye SK. Delirium in elderly adults: diagnosis,  
581 prevention and treatment. *Nat Rev Neurol* 2009; **5**: 210–20
- 582 47. Murtagh V, Belloli S, Di Grigoli G, et al. Age and Sex Influence the Neuro-  
583 inflammatory Response to a Peripheral Acute LPS Challenge. *Front Aging Neurosci*  
584 2019; **11**: 299
- 585 48. Wang D-S, Zurek AA, Lecker I, et al. Memory deficits induced by inflammation  
586 are regulated by  $\alpha$ 5-subunit-containing GABAA receptors. *Cell Rep* 2012; **2**: 488–96
- 587 49. Skelly DT, Griffin EW, Murray CL, et al. Acute transient cognitive dysfunction and  
588 acute brain injury induced by systemic inflammation occur by dissociable IL-1-  
589 dependent mechanisms. *Mol Psychiatry* 2019; **24**: 1533–48

- 590 50. Albrecht MA, Vaughn CN, Erickson MA, Clark SM, Tonelli LH. Time and  
591 frequency dependent changes in resting state EEG functional connectivity following  
592 lipopolysaccharide challenge in rats. *PLOS ONE* 2018; **13**: e0206985
- 593 51. Martin JC, Liley DTJ, Harvey AS, Kuhlmann L, Sleight JW, Davidson AJ.  
594 Alterations in the functional connectivity of frontal lobe networks preceding emergence  
595 delirium in children. *Anesthesiology* 2014; **121**: 740–52
- 596 52. Cape E, Hall RJ, van Munster BC, et al. Cerebrospinal fluid markers of  
597 neuroinflammation in delirium: A role for interleukin-1 $\beta$  in delirium after hip fracture. *J*  
598 *Psychosom Res* 2014; **77**: 219–25
- 599 53. Lewis AJ, Seymour CW, Rosengart MR. Current Murine Models of Sepsis. *Surg*  
600 *Infect* 2016; **17**: 385–93
- 601 54. Davis DHJ, Skelly DT, Murray C, et al. Worsening cognitive impairment and  
602 neurodegenerative pathology progressively increase risk for delirium. *Am J Geriatr*  
603 *Psychiatry Off J Am Assoc Geriatr Psychiatry* 2015; **23**: 403–15
- 604 55. Babiloni C, De Pandis MF, Vecchio F, et al. Cortical sources of resting state  
605 electroencephalographic rhythms in Parkinson's disease related dementia and  
606 Alzheimer's disease. *Clin Neurophysiol* 2011; **122**: 2355–64
- 607 56. Nakamura A, Cuesta P, Fernández A, et al. Electromagnetic signatures of the  
608 preclinical and prodromal stages of Alzheimer's disease. *Brain J Neurol* 2018; **141**:  
609 1470–85  
610

611 **Tables**  
612

| Measure  | Likelihood Ratio Test / Pairwise Comparison | $n_1, n_2$              | p-value           | Measure  | Likelihood Ratio Test / Pairwise Comparison | $n_1, n_2$                      | p-value                 |          |                    |
|----------|---------------------------------------------|-------------------------|-------------------|----------|---------------------------------------------|---------------------------------|-------------------------|----------|--------------------|
| <b>A</b> | <b>IL-6</b>                                 | $\chi^2(4) = 29.0$      |                   | <0.0001  | <b>B</b>                                    | <b>MCP-1</b>                    | $\chi^2(4) = 29.1$      |          | <0.0001            |
|          |                                             | VEH vs Low LPS          | 5,18              | 0.68     |                                             |                                 | VEH vs Low LPS          | 5,18     | 0.87               |
|          |                                             | VEH vs High LPS         | 5,8               | 0.0004   |                                             |                                 | VEH vs High LPS         | 5,8      | 0.0003             |
|          |                                             | Low LPS vs High LPS     | 18,8              | 0.0002   |                                             |                                 | Low LPS vs High LPS     | 18,8     | <0.0001            |
|          |                                             | VEH vs PXM+Low LPS      | 5,12              | 0.23     |                                             |                                 | VEH vs PXM+Low LPS      | 5,12     | 0.12               |
|          |                                             | Low LPS vs PXM+Low LPS  | 18,12             | 0.69     |                                             |                                 | Low LPS vs PXM+Low LPS  | 18,12    | 0.17               |
|          |                                             | Low LPS vs Aged Low LPS | 18,13             | 0.0033   |                                             |                                 | Low LPS vs Aged Low LPS | 18,13    | 0.014              |
| <b>C</b> | <b>SWA</b>                                  | $\chi^2(4) = 87.8$      |                   | <0.0001  | <b>D</b>                                    | <b>gamma</b>                    | $\chi^2(4) = 78.6$      |          | <0.0001            |
|          |                                             | VEH vs Low LPS          | 7,17              | <0.0001  |                                             |                                 | VEH vs Low LPS          | 7,17     | <0.0001            |
|          |                                             | VEH vs High LPS         | 7,8               | <0.0001  |                                             |                                 | VEH vs High LPS         | 7,8      | <0.0001            |
|          |                                             | Low LPS vs High LPS     | 17,8              | 0.041    |                                             |                                 | Low LPS vs High LPS     | 17,8     | 0.043              |
|          |                                             | VEH vs PXM+Low LPS      | 7,8               | 0.72     |                                             |                                 | VEH vs PXM+Low LPS      | 7,8      | 0.5                |
|          |                                             | Low LPS vs PXM+Low LPS  | 17,8              | <0.0001  |                                             |                                 | Low LPS vs PXM+Low LPS  | 17,8     | <0.0001            |
|          |                                             | Low LPS vs Aged Low LPS | 17,14             | 0.025    |                                             |                                 | Low LPS vs Aged Low LPS | 17,14    | 0.36               |
| Caffeine | $\chi^2(1) = 36.6$                          | 8,10                    | <0.001            | Caffeine | $\chi^2(1) = 61.5$                          | 8,10                            | <0.0001                 |          |                    |
| <b>E</b> | <b>wPLI</b>                                 | $\chi^2(4) = 26.2$      |                   | <0.0001  | <b>F</b>                                    | <b>Movt</b>                     | $\chi^2(4) = 18.8$      |          | 0.00085            |
|          |                                             | VEH vs Low LPS          | 7,17              | 0.011    |                                             |                                 | VEH vs Low LPS          | 7,17     | 0.014              |
|          |                                             | VEH vs High LPS         | 7,8               | 0.002    |                                             |                                 | VEH vs High LPS         | 7,8      | 0.0005             |
|          |                                             | Low LPS vs High LPS     | 17,8              | 0.61     |                                             |                                 | Low LPS vs High LPS     | 17,8     | 0.25               |
|          |                                             | VEH vs PXM+Low LPS      | 7,8               | 0.063    |                                             |                                 | VEH vs PXM+Low LPS      | 7,8      | 0.23               |
|          |                                             | Low LPS vs PXM+Low LPS  | 17,8              | 1        |                                             |                                 | Low LPS vs PXM+Low LPS  | 17,8     | 0.83               |
|          |                                             | Low LPS vs Aged Low LPS | 17,12             | 0.031    |                                             |                                 | Low LPS vs Aged Low LPS | 17,14    | 0.99               |
| Caffeine | $\chi^2(1) = 18.2$                          | 8,10                    | 0.0002            | Caffeine | $\chi^2(1) = 18.8$                          | 8,10                            | <0.0001                 |          |                    |
| <b>G</b> | <b>SWA<sub>Movt-matched</sub></b>           | $\chi^2(4) = 21.5$      |                   | 0.00025  | <b>H</b>                                    | <b>SWA<sub>Quiescent</sub></b>  | $\chi^2(4) = 19.7$      |          | 0.00057            |
|          |                                             | VEH vs Low LPS          | 7,16              | 0.0086   |                                             |                                 | VEH vs Low LPS          | 6,16     | 0.67               |
|          |                                             | VEH vs High LPS         | 7,5               | 0.0057   |                                             |                                 | VEH vs High LPS         | 6,5      | 0.32               |
|          |                                             | Low LPS vs High LPS     | 16,5              | 0.77     |                                             |                                 | Low LPS vs High LPS     | 16,5     | 0.82               |
|          |                                             | VEH vs PXM+Low LPS      | 7,7               | 1        |                                             |                                 | VEH vs PXM+Low LPS      | 6,7      | 1                  |
|          |                                             | Low LPS vs PXM+Low LPS  | 16,7              | 0.013    |                                             |                                 | Low LPS vs PXM+Low LPS  | 16,7     | 0.83               |
|          |                                             | Low LPS vs Aged Low LPS | 16,13             | 0.99     |                                             |                                 | Low LPS vs Aged Low LPS | 16,13    | 0.0086             |
| Caffeine | $\chi^2(1) = 3.98$                          | 8,8                     | 0.046             | Caffeine | $\chi^2(1) = 2.61$                          | 8,8                             | 0.11                    |          |                    |
| <b>I</b> | <b>wPLI<sub>Movt-matched</sub></b>          | $\chi^2(4) = 6.39$      |                   | 0.17     | <b>J</b>                                    | <b>wPLI<sub>Quiescent</sub></b> | $\chi^2(4) = 4.77$      |          | 0.31               |
|          |                                             | Caffeine                | $\chi^2(1) = 7.0$ | 8,6      |                                             |                                 | 0.0082                  | Caffeine | $\chi^2(1) = 1.49$ |

613

614 **Table 1. Statistical modeling results.** Shown are results of likelihood ratio tests for  
615 both the main models and models comparing caffeine experiments, along with  
616 associated sample counts ( $n_1, n_2$ ), p-values and the results of pairwise comparisons.  
617 Effects of LPS were tested by comparing models with and without the group-by-epoch  
618 interaction (or group itself for cytokine data) using likelihood ratio tests. Caffeine

619 experiments were fit in separate models together with equivalent saline controls; since  
620 there are only two factor levels no pairwise comparisons are needed. Post-hoc  
621 comparisons used the Kenward-Roger method and p-values for pairwise comparisons  
622 were adjusted for multiple comparisons by estimating a multivariate t-distribution using  
623 the emmeans package for R<sup>36</sup>.  
624

625 **Figure Captions**

626 **Figure 1. Proinflammatory cytokine levels in neocortex after LPS treatment. A.**

627 Shown are interleukin-6 (IL-6) protein concentrations measured via ELISA in neocortical  
628 homogenate samples from mice (including animals with and without EEG implant)  
629 euthanized four hours after LPS injection. Each point represents log IL-6 concentration  
630 (pg/ml) from samples obtained bilaterally from anterior (*ant*; *purple triangles*) or  
631 posterior cortex (*post*; *green circles*). Overlaid symbols (*black*) represent the within-  
632 group mean across all samples. Error bars represent  $\pm$  SEM. \* indicates significant  
633 difference from Vehicle. # indicates significant difference from Low LPS. **B.** Monocyte  
634 chemoattractant protein-1 (MCP-1) protein concentration values are shown. MCP-1  
635 samples below the threshold of detection were set to the square root of the lowest  
636 observed quantity (1.13). LPS, lipopolysaccharide; VEH, vehicle.

637

638 **Figure 2. Generalized slowing of EEG and disrupted functional connectivity**

639 **following LPS injection. A.** Representative time-domain EEG signals during the pre-  
640 injection baseline hour (*left*) and two hours post-injection (*right*) are shown for animals  
641 that received either a saline “Vehicle” (*top*) or 25  $\mu$ g/kg “Low” LPS injection (*bottom*).

642 Traces were selected based on having mean SWA values approximately equal to the

643 mean SWA over the entire hour. **B.** The time series of SWA (2-4Hz) normalized to

644 mean spectral power (2-80Hz) are shown for the different LPS doses. Symbols

645 represent the mean percent change in SWA from baseline across all animals at each

646 LPS dose at each recording hour. Error bars represent  $\pm$  SEM. **C.** Time series of alpha-

647 band (13-20Hz) anterior-posterior weighted-phase lag index (wPLI), a measure of

648 functional connectivity. **D.** The time series of movement for each LPS dose is shown.  
649 Symbols represent the mean percent change in movement from baseline across all  
650 animals at each dose of LPS at each recording hour. Error bars represent  $\pm$  SEM. **E.**  
651 Example EEG power spectra separated according to movement magnitude. Power  
652 spectra were calculated in overlapping 4-second windows and aligned with movement  
653 epochs, then data were binned into quiescence (i.e. zero movement, *left*), lower quartile  
654 movement (*middle*), or upper quartile movement (*right*), and averaged. Pre-injection  
655 spectra (“baseline”; *gray*) and average spectra of 1-3 hours post-injection (“peak”;  
656 *black*), averaged across four EEG channels, are shown from animals that received  
657 either Vehicle (*top*) or a 25  $\mu$ g/kg “Low” dose of LPS (*bottom*). LPS, lipopolysaccharide;  
658 SWA, slow-wave activity; VEH, vehicle; wPLI, weighted phase lag index.

659

660 **Figure 3. Changes in SWA and alpha-band wPLI during movement or quiescence.**

661 **A.** Movement-matched SWA values at baseline (*gray*) or peak LPS (*black*). Lines  
662 indicate mean log SWA values for individual animals while symbols represent group  
663 averages. Error bars indicate  $\pm$  SEM. \* indicates significant difference of differences  
664 from Vehicle. # indicates significant difference of differences from Low LPS. † indicates  
665 significant difference of differences from Saline + Low LPS. **B.** SWA during quiescence.  
666 **C.** Movement-matched alpha-band wPLI. **D.** Alpha wPLI during quiescence. CAFc,  
667 caffeine citrate; LPS, lipopolysaccharide; PXM, piroxicam; SWA, slow-wave activity;  
668 VEH, vehicle; wPLI, weighted phase lag index.

669

670 **Figure 4. Cytokine correlations with changes in movement-matched SWA. A.**

671 Scatterplot of the change in movement matched SWA from baseline to peak LPS  
672 versus log IL-6 concentration. Markers represent values for individual animals. The line  
673 indicates the polynomial least-squares fit (using the MATLAB function “regress”) for  
674 LPS-only groups, and the shading indicates the 95% prediction interval of the  
675 regression line. The  $R^2$  value for the fit is also indicated. **B.** Scatterplot of the change in  
676 movement matched SWA from baseline to peak versus log MCP-1 concentration. IL-6,  
677 interleukin-6; LPS, lipopolysaccharide; MCP-1, Monocyte chemoattractant protein-1;  
678 PXM, piroxicam; SWA, slow-wave activity; VEH, vehicle.

679

680 **Figure 5. EEG and movement time course summary across groups**

681 **A.** The time series of SWA (2-4Hz) normalized to mean spectral power (2-80Hz) are  
682 shown for all LPS groups (Vehicle, Low LPS, and High LPS are the same as in Figure.  
683 2). Symbols represent the mean percent change in SWA from baseline across all  
684 animals at each LPS dose at each recording hour. Error bars represent  $\pm$  SEM. **B.**  
685 Gamma power time series. **C.** Alpha wPLI time series. **D.** Movement time series. Bars  
686 indicate  $\pm$  SEM. CAFc, caffeine citrate; LPS, lipopolysaccharide; PXM, piroxicam; SWA,  
687 slow-wave activity; VEH, vehicle; wPLI, weighted phase lag index.

688

689 **Figure 6. Working model of inflammation-driven SWA**

690 Our working model of the generation of wakeful SWA relevant to delirium begins with  
691 systemic inflammation leading to Leptomeningeal-blood barrier inflammation, release of  
692 prostaglandin  $D_2$  (PGD<sub>2</sub>) and, via prostaglandin D receptor activation, release of

693 adenosine. The enrichment of prostaglandin D receptors on the basal forebrain and  
694 hypothalamus suggests that adenosine then acts at the nearby arousal centres to  
695 promote sleep, and cortical SWA during wake. However, prostaglandin D synthase is  
696 diffusely expressed by the leptomeninges, and found in CSF, and so we cannot exclude  
697 additional direct cortical actions to induce SWA. Understanding whether the SWA  
698 reflects global or local slow waves seems a critical next step to determine whether  
699 delirium involves activation of sleep centres (likely inducing global slow waves that  
700 typically occur early in the night) or also local changes that support more restricted SWA  
701 (that may reflect local changes in adenosine related to PGD<sub>2</sub> or metabolism).



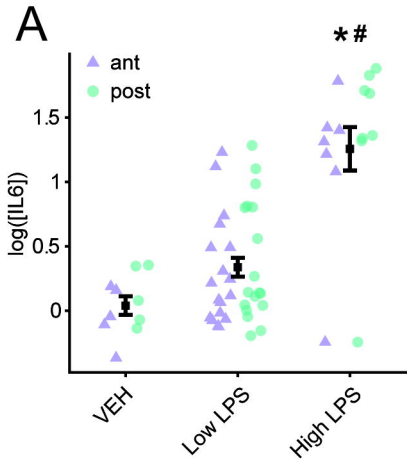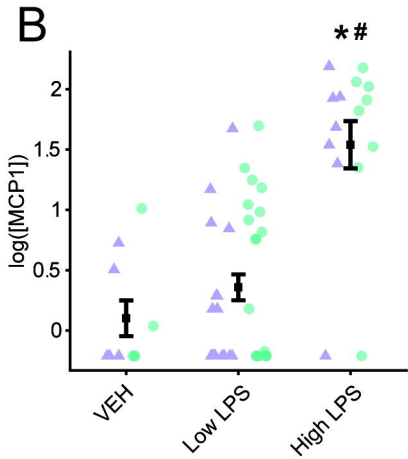

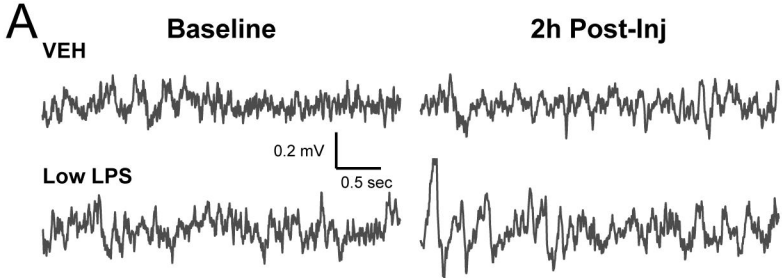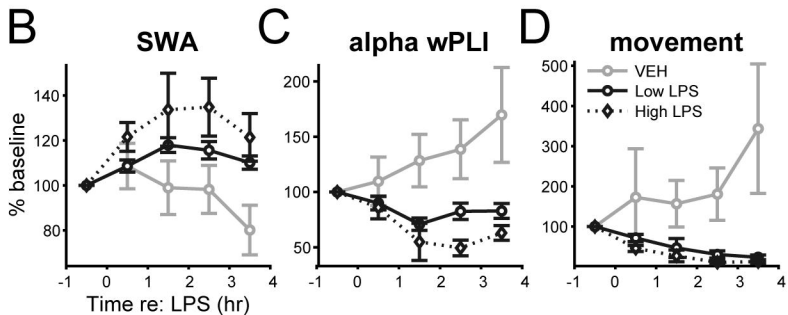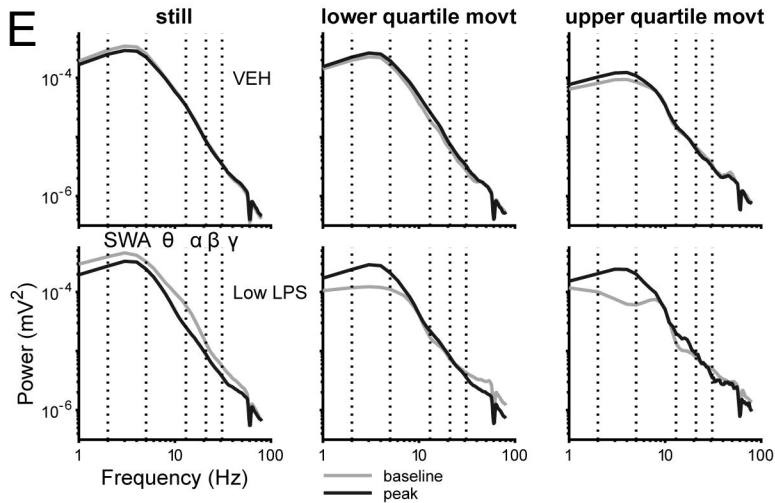

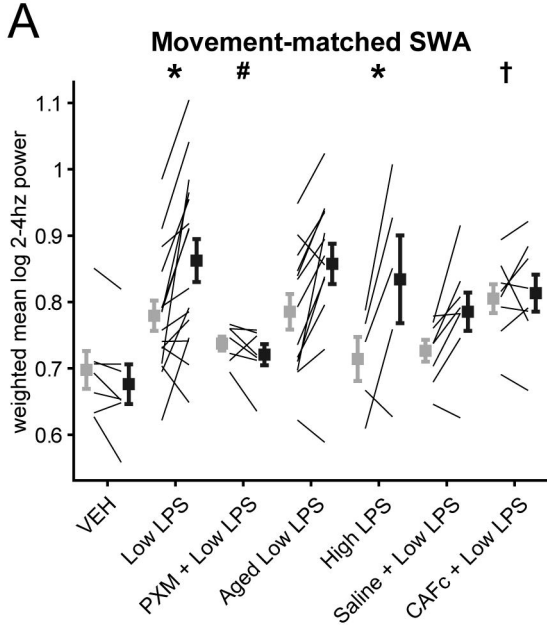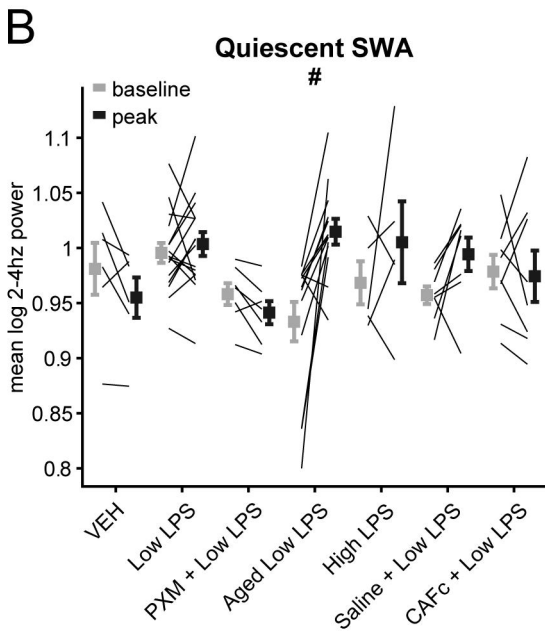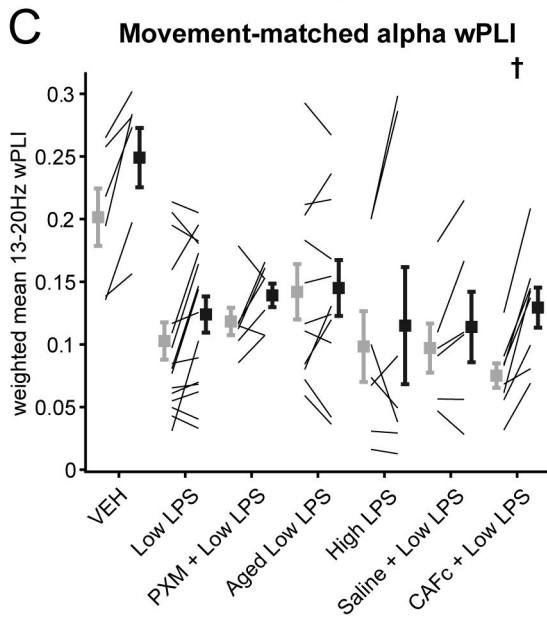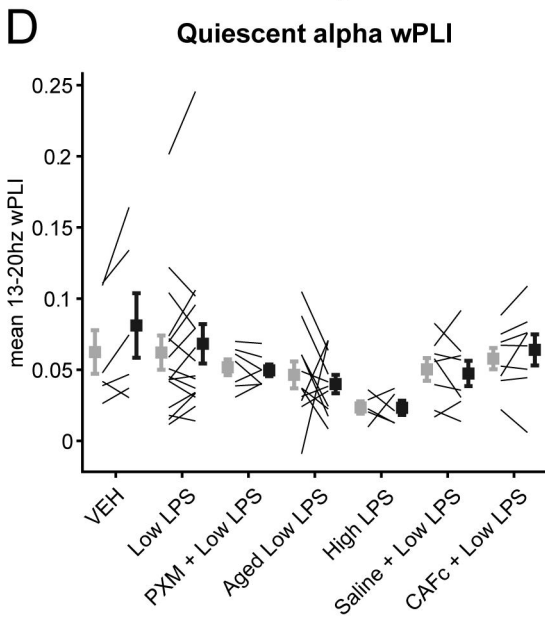

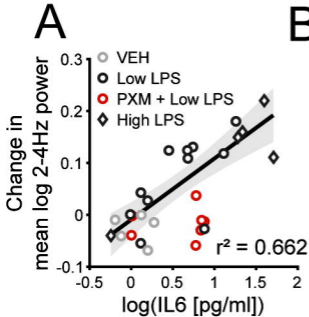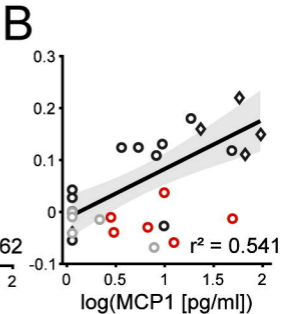

**A****SWA****B****alpha wPLI****C****movement**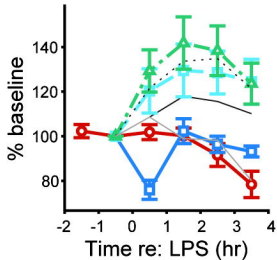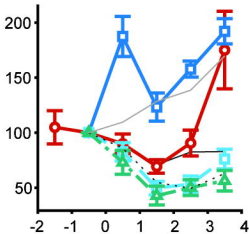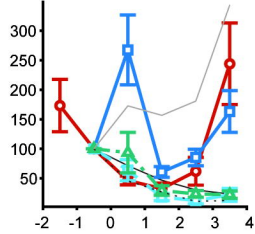

— VEH      — PXM + Low LPS  
 — Low LPS      — CAF + Low LPS  
 ···· High LPS      — Saline + Low LPS  
 - - - Aged Low LPS

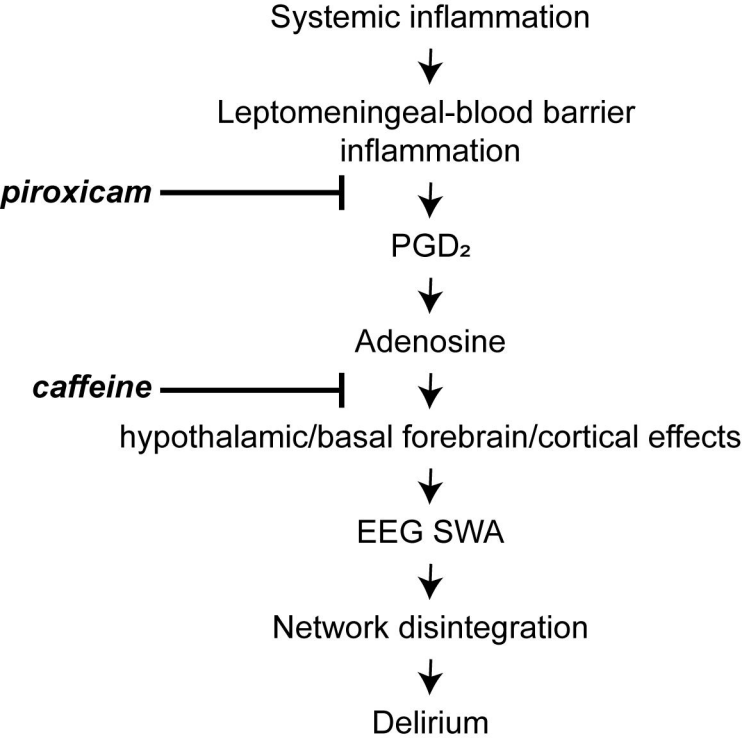

Source: http://biorxiv.org/content/10.1101/2020.11.25.398388v1.full.pdf
